# Supplementary material for: Preserving the shape of silver nanocubes under corrosive environment by covering their edges and corners with iridium
Source: Royal Society of Chemistry journal article supplement (doi:10.1039/d0nr05969b), 2020-01-01
Supplement: d0nr05969b1.pdf [file d0nr05969b1.pdf]

# Preserving the Shape of Silver Nanocubes under Corrosive Environment by Covering Their Edges and Corners with Iridium

Peng Wang,<sup>†,‡</sup> Jaewan Ahn,<sup>†</sup> Ruoqi Gao,<sup>†</sup> and Dong Qin<sup>\*,†</sup>

<sup>†</sup>School of Materials Science and Engineering, Georgia Institute of Technology, Atlanta, Georgia  
30332, United States

<sup>‡</sup>School of Materials Science and Engineering, Shandong University of Technology, Zibo,  
Shandong 255000, P. R. China

\*Corresponding author: dong.qin@mse.gatech.edu

**Keywords:** *Ag nanocrystals, shape stability, oxidative etching, site-selective deposition, bimetallic nanocrystals*

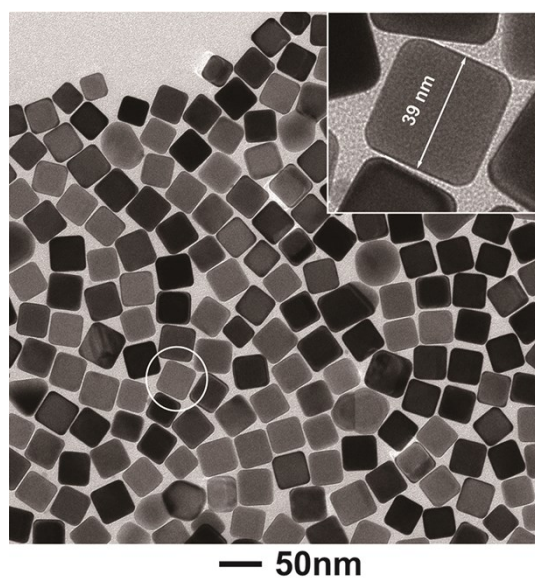

**Fig. S1** TEM image of the Ag nanocubes with an average edge length of  $38.7 \pm 2.6$  nm.

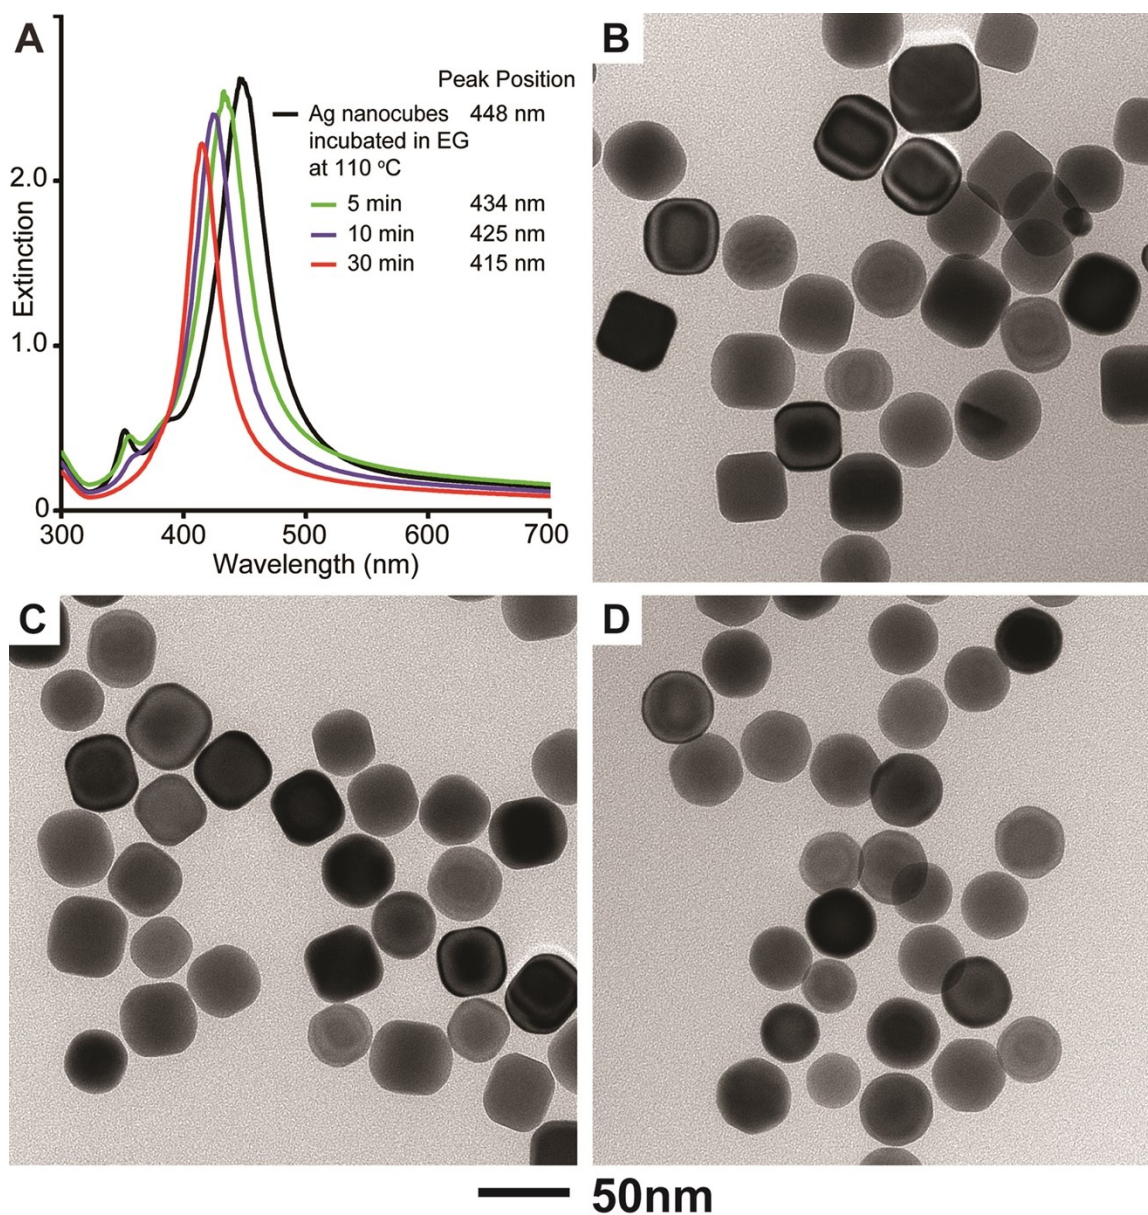

**Fig. S2** (A) UV-vis spectra recorded from suspensions of the Ag nanocubes before and after they had been treated in a PVP/EG solution at 110 °C for different periods of time. (B-D) TEM images of the resultant nanoparticles after the thermal treatment at (B) 5, (C) 10, and (D) 30 min, respectively.

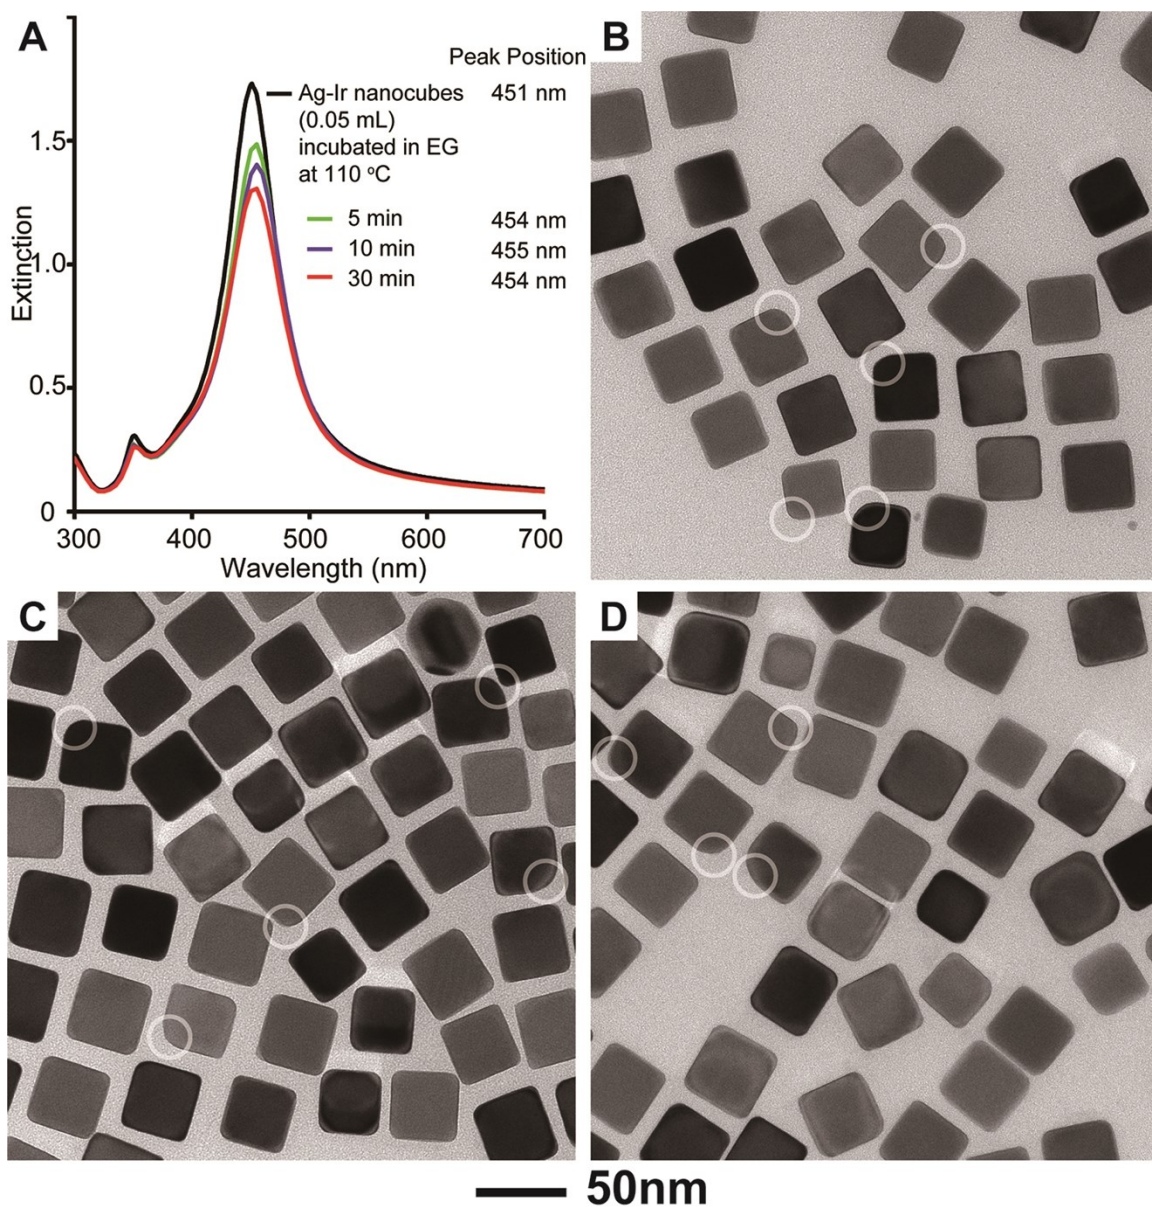

**Fig. S3** (A) UV-vis spectra recorded from suspensions of the Ag-Ir nanocubes before and after they had been incubated in a PVP/EG solution at 110 °C for different periods of time. These Ag-Ir nanocubes were prepared by reacting the Ag nanocubes with 0.05 mL of the  $\text{Na}_3\text{IrCl}_6$  solution. (C-D) TEM images of the resultant nanoparticles after the thermal treatment for (B) 5, (C) 10, and (D) 30 min, respectively.



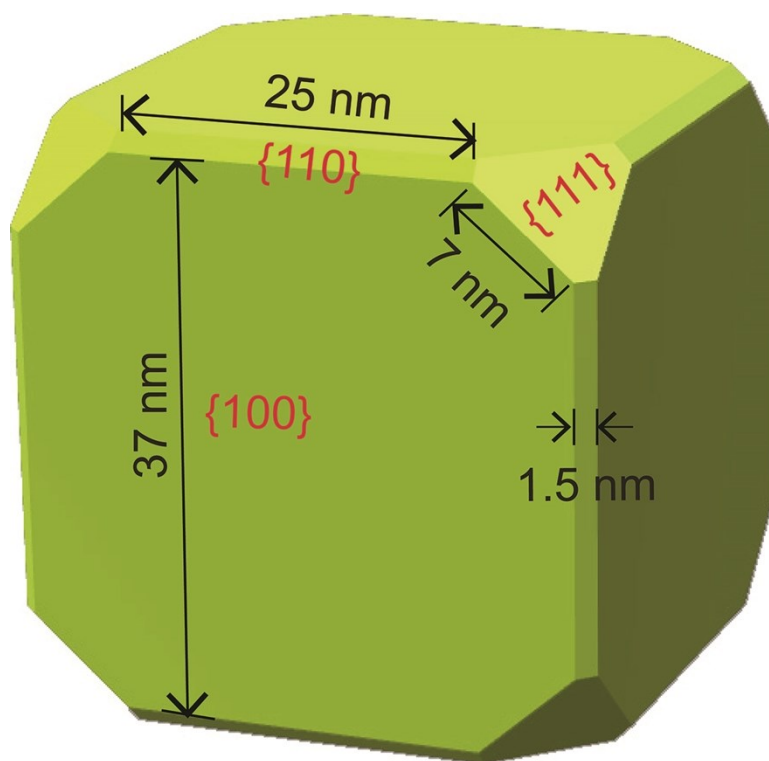

**Fig. S4** Schematic illustration of a Ag nanocube, with all the dimensions labeled, used for calculating the Ir coverage on the edges and corners of a Ag nanocube.

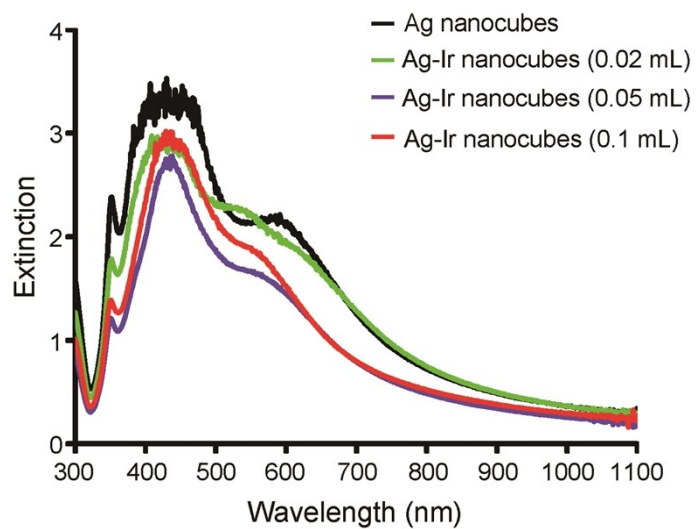

**Fig. S5** UV-vis spectra recorded from the aqueous suspension of 2,6-DMPI ( $10^{-4}$  M) functionalized Ag nanocubes and Ag-Ir nanocubes prepared at different titration volume of  $\text{Na}_3\text{IrCl}_6$ .

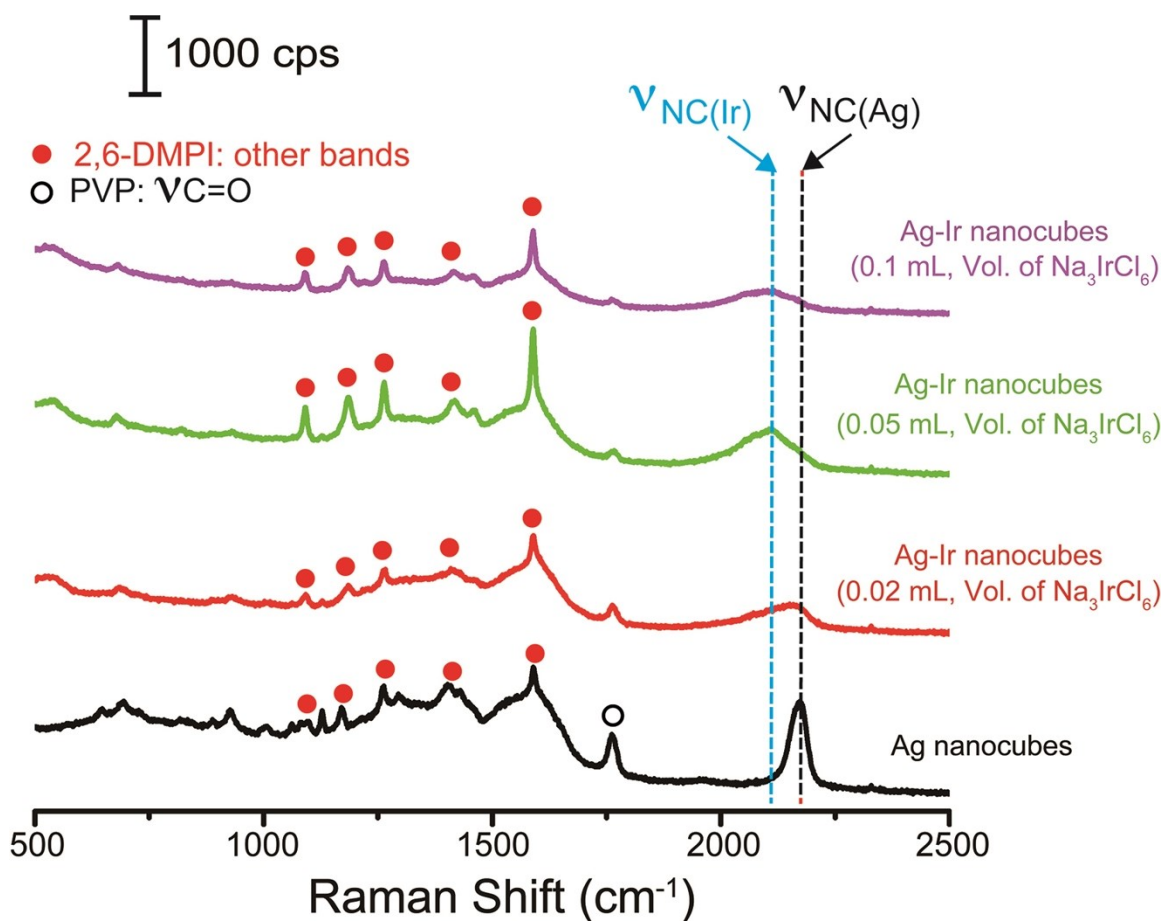

**Fig. S6** SERS spectra recorded from an aqueous suspension of the 2,6-DMPI-functionalized Ag-Ir nanocubes with laser excitation at 532 nm. The Ag-Ir nanocubes were prepared by reacting the Ag nanocubes with different volumes of  $\text{Na}_3\text{IrCl}_6$  solution, as marked on each spectrum.

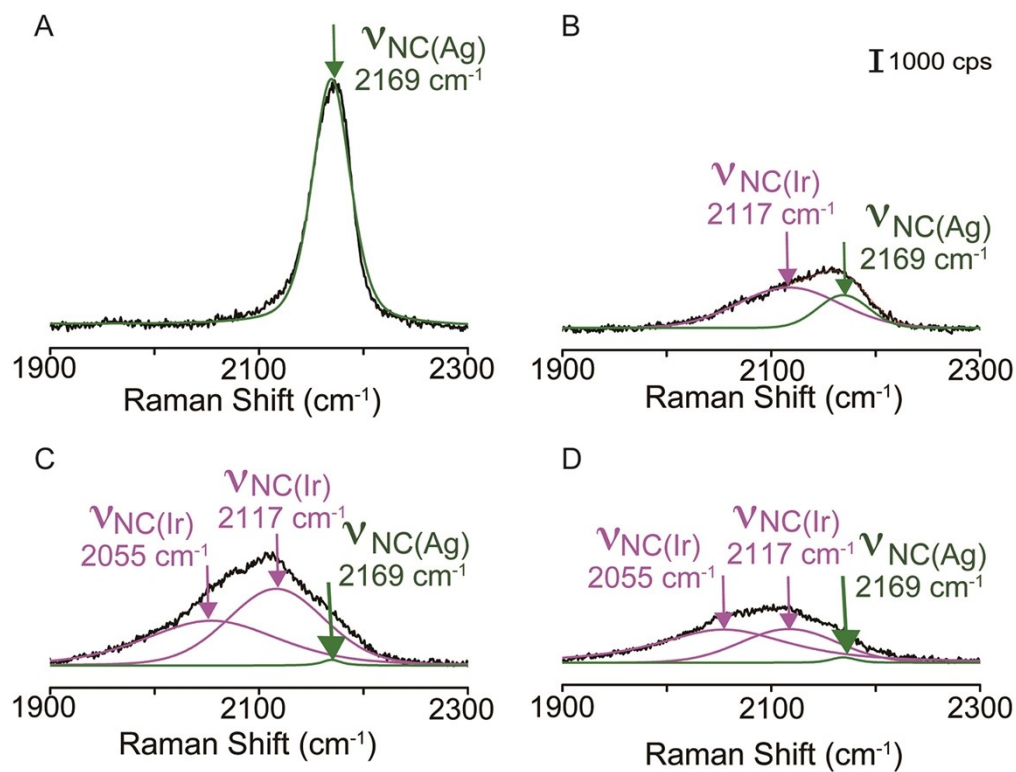

**Fig. S7** SERS spectra recorded from an aqueous suspension of the 2,6-DMPI-functionalized Ag-Ir nanocubes after background subtraction and the corresponding curve fitting results. The Ag-Ir nanocubes were prepared by reacting the Ag nanocubes with different volumes of the  $\text{Na}_3\text{IrCl}_6$  solution: (A) 0, (B) 0.02, (C) 0.05, and (D) 0.1 mL, respectively.



**Table S1** The Ag and Ir contents in the solid products determined using ICP-MS analyses.

| Samples                             | Ag content ( $\mu\text{g}$ ) |                    | Ir content ( $\mu\text{g}$ ) |                 | Ir to Ag atomic ratio |         |
|-------------------------------------|------------------------------|--------------------|------------------------------|-----------------|-----------------------|---------|
|                                     | Measured                     | Average            | Measured                     | Average         | Calculated            | Average |
| Sample 1                            | 170.49                       |                    | 0.81                         |                 | 1:375                 |         |
| (0.02 mL                            | 165.35                       | 179.74 $\pm$ 16.85 | 0.72                         | 0.73 $\pm$ 0.06 | 1:409                 | 1:444   |
| Na <sub>3</sub> IrCl <sub>6</sub> ) | 203.39                       |                    | 0.66                         |                 | 1:549                 |         |
| Sample 2                            | 182.74                       |                    | 1.42                         |                 | 1:229                 |         |
| (0.05 mL                            | 178.31                       | 184.96 $\pm$ 6.53  | 1.41                         | 1.37 $\pm$ 0.06 | 1:225                 | 1:241   |
| Na <sub>3</sub> IrCl <sub>6</sub> ) | 193.84                       |                    | 1.28                         |                 | 1:270                 |         |
| Sample 3                            | 198.72                       |                    | 2.07                         |                 | 1:171                 |         |
| (0.1 mL                             | 174.70                       | 194.94 $\pm$ 15.22 | 1.93                         | 2.10 $\pm$ 0.16 | 1:161                 | 1:165   |
| Na <sub>3</sub> IrCl <sub>6</sub> ) | 211.41                       |                    | 2.31                         |                 | 1:163                 |         |
| Sample 4                            | 195.95                       |                    | 3.91                         |                 | 1:89                  |         |
| (0.2 mL                             | 182.77                       | 191.79 $\pm$ 6.38  | 3.69                         | 3.68 $\pm$ 0.19 | 1:88                  | 1:93    |
| Na <sub>3</sub> IrCl <sub>6</sub> ) | 196.64                       |                    | 3.44                         |                 | 1:102                 |         |
| Sample 5                            | 171.33                       |                    | 9.93                         |                 | 1:31                  |         |
| (0.4 mL                             | 135.64                       | 144.41 $\pm$ 19.42 | 9.37                         | 8.84 $\pm$ 0.16 | 1:26                  | 1:29    |
| Na <sub>3</sub> IrCl <sub>6</sub> ) | 126.25                       |                    | 7.23                         |                 | 1:31                  |         |

## Appendix 1: Calculation of the number of Ag nanocubes in the reaction

Because the Ag-Ir nanocubes prepared by 0.1 mL of  $\text{Na}_3\text{IrCl}_3$  solution show shape stability in EG and PVP, we used the average Ag mass in solid listed in Table S1,  $194.94 \pm 15.22 \mu\text{g}$ , to calculate the number of Ag nanocubes in the reaction solution. Based on our TEM results that give the average edge length of Ag nanocubes is  $38.7 \pm 2.6 \text{ nm}$ , we developed a model of Ag nanocube with dimension labelled in Fig. S3 to complete the following steps:

1. Calculation of the average number of Ag atoms,  $n_1(\text{Ag})$ , in the reaction solution:

$$\begin{aligned} n_1(\text{Ag}) &= [(0.19494 \text{ mg}) / (107.86 \times 10^3 \text{ mg/mol})] \times 6.022 \times 10^{23} \text{ atoms/mol} \\ &= 1.09 \times 10^{18} \text{ atoms} \end{aligned}$$

2. Calculation of the volume of a Ag nanocube,  $V(\text{Ag nanocube})$ .

$$V(\text{Ag nanocube}) = (39 \text{ nm})^3 - 1/2 \times (1.5 \times \sqrt{2}/2 \text{ nm})^2 \times 25 \text{ nm} \times 12 - 1/3 \times 1/2 \times [\sqrt{2}/2 (7 + 2 \times 1.5 \text{ nm})]^3 \times 8 = 58679 \text{ nm}^3$$

3. Calculation of the number of Ag atoms in a Ag nanocube,  $n_2(\text{Ag})$ , with an edge length of 39 nm using unit cell approach with the lattice constant of Ag at 0.408 nm:

$$n_2(\text{Ag}) = V(\text{Ag nanocube}) / \text{the volume of a unit cell} \times 4 = 58679 \text{ nm}^3 / (0.408 \text{ nm})^3 \times 4 = 3.46 \times 10^6 \text{ atoms}$$

4. Calculation of number of Ag nanocubes,  $n_3(\text{nanocube})$  in the reaction solution:

$$n_3(\text{nanocube}) = (1.09 \times 10^{18} \text{ atoms}) / (3.46 \times 10^6 \text{ atoms}) = 3.15 \times 10^{11} \text{ Ag nanocubes}$$

## Appendix 2: Calculation of Ir atoms deposited onto a Ag nanocube

Based on the ICP-MS results from Table S1, the average mass of Ir in the solid sample 3 prepared from 0.1 mL  $\text{Na}_3\text{IrCl}_6$  was  $2.10 \pm 0.16 \mu\text{g}$ . We calculated the number of Ir atoms deposited on a Ag nanocube with an edge length of 39 nm as follows:

1. Calculation of the number of Ir atoms,  $n_1(\text{Ir})$ , on Ag-Ir nanocubes:

$$n_1(\text{Ir}, 0.1 \text{ mL}) = [2.10 \times 10^{-6} \text{ g} / (192.21 \text{ g/mol})] \times 6.022 \times 10^{23} \text{ atoms/mol} = 6.58 \times 10^{15} \text{ atoms}$$

2. Calculation of the number of Ir atoms,  $n_2(\text{Ir})$ , deposited to one Ag nanocube:

$$n_2(\text{Ir}, 0.1 \text{ mL}) = (6.58 \times 10^{15} \text{ atoms} / 3.15 \times 10^{11} \text{ cubes}) = 20889 \text{ atoms/cube}$$

3. By using the same number of Ag nanocubes,  $3.15 \times 10^{11}$  in the reaction solution (see Appendix 1) and the average mass of Ir in the solid sample, 2 and 3, prepared by 0.02 and 0.05 mL  $\text{Na}_3\text{IrCl}_6$  (see Table S1), we repeated Step 1-2 to calculate  $n_2(\text{Ir})$  for these two samples:

$$n_1(\text{Ir}, 0.02 \text{ mL}) = [0.73 \times 10^{-6} \text{ g} / (192.21 \text{ g/mol})] \times 6.022 \times 10^{23} \text{ atoms/mol} = 2.29 \times 10^{15} \text{ atoms}$$

$$n_2(\text{Ir}, 0.02 \text{ mL}) = (2.29 \times 10^{15} \text{ atoms} / 3.15 \times 10^{11} \text{ cubes}) = 7261 \text{ atoms/cube}$$

$$n_1(\text{Ir}, 0.05 \text{ mL}) = [1.37 \times 10^{-6} \text{ g} / (192.21 \text{ g/mol})] \times 6.022 \times 10^{23} \text{ atoms/mol} = 4.29 \times 10^{15} \text{ atoms}$$

$$n_2(\text{Ir}, 0.05 \text{ mL}) = (4.29 \times 10^{15} \text{ atoms} / 3.15 \times 10^{11} \text{ cubes}) = 13628 \text{ atoms/cube}$$

### Appendix 3. Calculation of the surface coverage of Ir atoms on the edges and corners of a Ag nanocube

1. Calculation of the surface area of 12 edges and 8 corners of a Ag nanocube:

Based on the dimension of a Ag nanocube as shown in Fig. S4, we calculated the surface area of edges (Ag(110) surfaces),  $S_{\text{edge}}$ , and corners (Ag(111) surfaces),  $S_{\text{corner}}$ , of one Ag nanocube as follows:

$$S_{\text{edge}} = 25 \text{ nm} \times 1.5 \text{ nm} \times 12 = 450 \text{ nm}^2$$

$$S_{\text{corner}} = [1/2 \times (7 + 2 \times 1.5 \text{ nm}) \times \sqrt{3}/2 (7 + 2 \times 1.5 \text{ nm}) - 1/2 \times 1.5 \text{ nm} \times (\sqrt{3}/2 \times 1.5 \text{ nm}) \times 3] \times 8 = 323 \text{ nm}^2$$

2. Assuming that Ir atoms would form one atomic layer on all edges and corners of Ag nanocube, we argue that the thickness of the layer is equivalent to the lattice constant of Ir at 0.3839 nm. As such, we calculated the total volume of Ir atoms needed to form one atomic layer on the edges and corners of one nanocube,  $V(\text{Ir})$ , as follows:

$$V(\text{Ir, edges}) = 450 \text{ nm}^2 \times 0.3839 \text{ nm} = 172.75 \text{ nm}^3$$

$$V(\text{Ir, edges and corners}) = 450 \text{ nm}^2 \times 0.3839 \text{ nm} + 323 \text{ nm}^2 \times 0.3839 \text{ nm} = 296.75 \text{ nm}^3$$

3. We calculated the number of Ir atoms needed to form one atomic layer of Ir on edges only and both edges and corners of one Ag nanocube,  $n_3(\text{Ir})$ , using the unit cell approach as follows:

$$n_3(\text{Ir, edges}) = [172.75 \text{ nm}^3 / (0.3839 \text{ nm})^3 / \text{unit cell}] \times 4 \text{ atoms/unit cell} = 12213 \text{ atoms/cube}$$

$$n_3(\text{Ir, edges and corners}) = [296.75 \text{ nm}^3 / (0.3839 \text{ nm})^3 / \text{unit cell}] \times 4 \text{ atoms/unit cell} = 20980 \text{ atoms/cube}$$

4. Based on the Ir atoms deposited on one Ag nanocube,  $n_2(\text{Ir, 0.02, 0.05, and 0.1 mL})$  (see Appendix 2), we calculate the surface coverage of Ir atoms,  $N(\text{Ir})$ , on all edges of a Ag nanocube as follows:

$$N(\text{Ir, 0.02 mL, edges}) = n_2(\text{Ir, 0.02 mL}) / n_3(\text{Ir}) = 7261 \text{ atoms} / 12213 \text{ atoms} = 59.4\%$$

$$N(\text{Ir, 0.05 mL, edges}) = n_2(\text{Ir, 0.05 mL}) / n_3(\text{Ir}) = 13628 \text{ atoms} / 12213 \text{ atoms} = 111.6\%$$

$$N(\text{Ir, 0.1 mL, edges}) = n_2(\text{Ir, 0.1 mL}) / n_3(\text{Ir}) = 20889 \text{ atoms} / 12213 \text{ atoms} = 170.0\%$$

5. Based on the Ir atoms deposited on one Ag nanocube,  $n_2(\text{Ir}, 0.02, 0.05, \text{ and } 0.1 \text{ mL})$  (see Appendix 2), we calculate the surface coverage of Ir atoms,  $N(\text{Ir})$ , on all edges and corners of a Ag nanocube as follows:

$$N(\text{Ir}, 0.02 \text{ mL, edges and corners}) = n_2(\text{Ir}, 0.02 \text{ mL})/n_3(\text{Ir}) = 7261 \text{ atoms} / 20980 \text{ atoms} = 34.6\%$$

$$N(\text{Ir}, 0.05 \text{ mL, edges and corners}) = n_2(\text{Ir}, 0.05 \text{ mL})/n_3(\text{Ir}) = 13628 \text{ atoms} / 20980 \text{ atoms} = 64.9\%$$

$$N(\text{Ir}, 0.1 \text{ mL, edges and corners}) = n_2(\text{Ir}, 0.1 \text{ mL})/n_3(\text{Ir}) = 20889 \text{ atoms} / 20980 \text{ atoms} = 99.5\%$$
